# Supplementary material for: Wnt Site Signaling Inhibitor Secreted Frizzled‐Related Protein 3 Protects Mitral Valve Endothelium From Myocardial Infarction–Induced Endothelial‐to‐Mesenchymal Transition
Source: PubMed Central journal article supplement — J Am Heart Assoc. 2022 Mar 29;11(7):e023695. doi: 10.1161/JAHA.121.023695 (PMC9075477; doi:10.1161/jaha.121.023695), 2022-03-29
Supplement: JAH3-11-e023695-s001.pdf [file JAH3-11-e023695-s001.pdf]

# **SUPPLEMENTAL MATERIAL**

**Table S1. Major Resources.****Animals (in vivo studies)**

| Species | Vendor or Source | Background Strain | Sex | Persistent ID / URL                                                         |
|---------|------------------|-------------------|-----|-----------------------------------------------------------------------------|
| Sheep   | New England Ovis | Polypay           | M   | <a href="http://neosheep.com/index.html">http://neosheep.com/index.html</a> |
| Sheep   | New England Ovis | Polypay           | F   | <a href="http://neosheep.com/index.html">http://neosheep.com/index.html</a> |
|         |                  |                   |     |                                                                             |

**Genetically Modified Animals**

|                 | Species | Vendor or Source | Background Strain | Other Information | Persistent ID / URL |
|-----------------|---------|------------------|-------------------|-------------------|---------------------|
| Parent - Male   |         |                  |                   |                   |                     |
| Parent - Female |         |                  |                   |                   |                     |

**Antibodies**

| Target antigen                     | Vendor or Source       | Catalog #          | Dilution, [ab] | Lot #          | Persistent ID / URL                                                                                                                                                                                                                                                                             |
|------------------------------------|------------------------|--------------------|----------------|----------------|-------------------------------------------------------------------------------------------------------------------------------------------------------------------------------------------------------------------------------------------------------------------------------------------------|
| CDH5 middle region                 | Aviva Systems Biology  | ARP60108_P050-FITC | 0.008 mg/ml    | QC32476-200711 | <a href="https://www.avivasysbio.com/cdh5-antibody-middle-region-fitc-arp60108-p050-fitc.html">https://www.avivasysbio.com/cdh5-antibody-middle-region-fitc-arp60108-p050-fitc.html</a>                                                                                                         |
| Rabbit IgG Isotype Control         | Southern Biotechnology | 0111-02            | 0.005 mg/ml    | A0316-X056J    | <a href="https://www.southernbiotech.com/PolyclonalIDetails.aspx?catno=0111-02#&amp;panel2-1">https://www.southernbiotech.com/PolyclonalIDetails.aspx?catno=0111-02#&amp;panel2-1</a>                                                                                                           |
| alpha smooth muscle Actin [E184]   | Abcam                  | ab209435           | 0.001 mg/ml    | GR3274389-1    | <a href="https://www.abcam.com/alpha-smooth-muscle-actin-antibody-e184-pe-ab209435.html?productWallTab=ShowAll">https://www.abcam.com/alpha-smooth-muscle-actin-antibody-e184-pe-ab209435.html?productWallTab=ShowAll</a>                                                                       |
| Rabbit IgG PE-conjugated Antibody  | R&D Systems            | IC1051P            | 0.0005 mg/ml   | AESF0116091    | <a href="https://www.rndsystems.com/products/rabbit-igg-pe-conjugated-antibody_ic1051p">https://www.rndsystems.com/products/rabbit-igg-pe-conjugated-antibody_ic1051p</a>                                                                                                                       |
| FOXM1                              | Novusbio               | NBP130961          | 1:300          | 42613          | <a href="https://www.novusbio.com/products/foxm1-antibody_nbp1-30961">https://www.novusbio.com/products/foxm1-antibody_nbp1-30961</a>                                                                                                                                                           |
| $\alpha$ SMA                       | Dako                   | M0851              | 1:150          | 20049711       | <a href="https://www.agilent.com/en/product/immunohistochemistry/antibodies-controls/primary-antibodies/actin-(smooth-muscle)-(concentrate)-76542">https://www.agilent.com/en/product/immunohistochemistry/antibodies-controls/primary-antibodies/actin-(smooth-muscle)-(concentrate)-76542</a> |
| Ki67 (IF)                          | Abcam                  | 156956             | 1:50           | GR271158-47    | <a href="https://www.abcam.com/ki67-antibody-oti5d7-ab156956.html#lb">https://www.abcam.com/ki67-antibody-oti5d7-ab156956.html#lb</a>                                                                                                                                                           |
| Ki67 (IHC)                         | Abcam                  | 15580              | 1:100          | GR3268067-1    | <a href="https://www.abcam.com/ki67-antibody-ab15580.html">https://www.abcam.com/ki67-antibody-ab15580.html</a>                                                                                                                                                                                 |
| $\beta$ -Catenin (IF)              | Abcam                  | 22656              | 1:100          | GR3238275-2    | <a href="https://www.abcam.com/beta-catenin-antibody-12f7-ab22656.html">https://www.abcam.com/beta-catenin-antibody-12f7-ab22656.html</a>                                                                                                                                                       |
| CD31                               | Novusbio               | NB10001642         | 1:50           | E-3            | <a href="https://www.novusbio.com/products/cd31-pecam-1-antibody-mec-746_nb100-1642">https://www.novusbio.com/products/cd31-pecam-1-antibody-mec-746_nb100-1642</a>                                                                                                                             |
| Phospho- $\beta$ -Catenin (Ser552) | Cell Signaling         | 9566               | 1:3000         | 2              | <a href="https://www.cellsignal.com/products/primary-antibodies/phospho-b-catenin-ser552-antibody/9566">https://www.cellsignal.com/products/primary-antibodies/phospho-b-catenin-ser552-antibody/9566</a>                                                                                       |
| $\beta$ -Catenin                   | Cell Signaling         | 9562               | 1:3000         | 13             | <a href="https://www.cellsignal.com/products/primary-antibodies/b-catenin-antibody/9562">https://www.cellsignal.com/products/primary-antibodies/b-catenin-antibody/9562</a>                                                                                                                     |
| Slug (A-7)                         | Santa Cruz             | Sc-166476          | 1:500          | A2120          | <a href="https://www.scbt.com/p/slug-antibody-a-7">https://www.scbt.com/p/slug-antibody-a-7</a>                                                                                                                                                                                                 |

|                                                        |                      |          |          |                  |                                                                                                                                                                                                                                                                                       |
|--------------------------------------------------------|----------------------|----------|----------|------------------|---------------------------------------------------------------------------------------------------------------------------------------------------------------------------------------------------------------------------------------------------------------------------------------|
| FOXm1<br>[EPR17379]                                    | Abcam                | ab207298 | 1:1000   | GR32533<br>330-3 | <a href="https://www.abcam.com/foxm1-antibody-epr17379-ab207298.html">https://www.abcam.com/foxm1-antibody-epr17379-ab207298.html</a>                                                                                                                                                 |
| VE-cadherin                                            | Invitrogen           | 36-1900  | 1:500    | SA24529<br>2     | <a href="https://www.thermofisher.com/antibody/product/VE-cadherin-Antibody-Polyclonal/36-1900">https://www.thermofisher.com/antibody/product/VE-cadherin-Antibody-Polyclonal/36-1900</a>                                                                                             |
| $\alpha$ SMA                                           | Millipore<br>Sigma   | A5228    | 1: 12000 | 099M484<br>8V    | <a href="https://www.sigmaaldrich.com/catalog/product/sigma/a5228?lang=en&amp;region=US">https://www.sigmaaldrich.com/catalog/product/sigma/a5228?lang=en&amp;region=US</a>                                                                                                           |
| rabbit IgG,<br>HRP-linked                              | Cell<br>Signaling    | 7074     | 1:5000   | 29               | <a href="https://www.cellsignal.com/products/secondary-antibodies/anti-rabbit-igg-hrp-linked-antibody/7074">https://www.cellsignal.com/products/secondary-antibodies/anti-rabbit-igg-hrp-linked-antibody/7074</a>                                                                     |
| Alexa Fluor®<br>488 goat<br>anti-rabbit<br>IgG (H+L)   | Invitrogen           | A-11034  | 2 ug/ml  | 662488           | <a href="https://www.thermofisher.com/antibody/product/Goat-anti-Rabbit-IgG-H-L-Highly-Cross-Adsorbed-Secondary-Antibody-Polyclonal/A-11034">https://www.thermofisher.com/antibody/product/Goat-anti-Rabbit-IgG-H-L-Highly-Cross-Adsorbed-Secondary-Antibody-Polyclonal/A-11034</a>   |
| Alexa Fluor™<br>546 donkey<br>anti-rabbit<br>IgG (H+L) | Invitrogen           | A10036   | 2 ug/ml  | 1832039          | <a href="https://www.thermofisher.com/antibody/product/Donkey-anti-Rabbit-IgG-H-L-Highly-Cross-Adsorbed-Secondary-Antibody-Polyclonal/A10040">https://www.thermofisher.com/antibody/product/Donkey-anti-Rabbit-IgG-H-L-Highly-Cross-Adsorbed-Secondary-Antibody-Polyclonal/A10040</a> |
| Alexa Fluor<br>anti-rabbit<br>647                      | Fisher<br>Scientific | A21244   | 1:500    | 2086730          | <a href="https://www.thermofisher.com/antibody/product/Goat-anti-Rabbit-IgG-H-L-Cross-Adsorbed-Secondary-Antibody-Polyclonal/A-21244">https://www.thermofisher.com/antibody/product/Goat-anti-Rabbit-IgG-H-L-Cross-Adsorbed-Secondary-Antibody-Polyclonal/A-21244</a>                 |
| Alexa Fluor<br>anti-mouse<br>488                       | Fisher<br>Scientific | A11001   | 1:500    | 2090562          | <a href="https://www.thermofisher.com/antibody/product/Goat-anti-Mouse-IgG-H-L-Cross-Adsorbed-Secondary-Antibody-Polyclonal/A-11001">https://www.thermofisher.com/antibody/product/Goat-anti-Mouse-IgG-H-L-Cross-Adsorbed-Secondary-Antibody-Polyclonal/A-11001</a>                   |
| Alexa Fluor<br>anti-rat 594                            | Fisher<br>Scientific | A11007   | 1:500    | 2107787          | <a href="https://www.thermofisher.com/antibody/product/Goat-anti-Rat-IgG-H-L-Cross-Adsorbed-Secondary-Antibody-Polyclonal/A-11007">https://www.thermofisher.com/antibody/product/Goat-anti-Rat-IgG-H-L-Cross-Adsorbed-Secondary-Antibody-Polyclonal/A-11007</a>                       |

### DNA/cDNA Clones

| Clone Name | Sequence | Source / Repository | Persistent ID / URL |
|------------|----------|---------------------|---------------------|
|            |          |                     |                     |
|            |          |                     |                     |
|            |          |                     |                     |

### Cultured Cells

| Name                                        | Vendor or Source          | Sex (F, M, or unknown) | Persistent ID / URL |
|---------------------------------------------|---------------------------|------------------------|---------------------|
| mitral valve endothelial cells (mitral VEC) | Ovine mitral valve tissue | unknown                |                     |
| carotid artery endothelial cells (CAEC)     | Ovine carotid artery      | unknown                |                     |
|                                             |                           |                        |                     |

### Data & Code Availability

| Description | Source / Repository | Persistent ID / URL |
|-------------|---------------------|---------------------|
|             |                     |                     |
|             |                     |                     |

### Other

| Description | Source / Repository | Persistent ID / URL |
|-------------|---------------------|---------------------|
|             |                     |                     |

|                                                           |                                 |                                                                                                                                                                                                                                                                                                                                                                                                                                                           |
|-----------------------------------------------------------|---------------------------------|-----------------------------------------------------------------------------------------------------------------------------------------------------------------------------------------------------------------------------------------------------------------------------------------------------------------------------------------------------------------------------------------------------------------------------------------------------------|
| Fixation Buffer                                           | Biolegend, Cat# 420801          | <a href="https://sandbox.biolegend.com/en-us/products/fixation-buffer-1496">https://sandbox.biolegend.com/en-us/products/fixation-buffer-1496</a>                                                                                                                                                                                                                                                                                                         |
| Intracellular Staining Permeabilization Wash Buffer (10X) | Biolegend, Cat# 421002          | <a href="https://www.biolegend.com/en-us/global-elements/pdf-popup/intracellular-staining-permeabilization-wash-buffer-10x-1497?filename=Intracellular%20Staining%20Permeabilization%20Wash%20Buffer%2010X.pdf&amp;pdfgen=true">https://www.biolegend.com/en-us/global-elements/pdf-popup/intracellular-staining-permeabilization-wash-buffer-10x-1497?filename=Intracellular%20Staining%20Permeabilization%20Wash%20Buffer%2010X.pdf&amp;pdfgen=true</a> |
| Human TruStain FcX™, Fc Receptor Blocking Solution        | Biolegend, Cat# 422301          | <a href="https://sandbox.biolegend.com/en-us/products/human-trustain-fcx-fc-receptor-blocking-solution-6462">https://sandbox.biolegend.com/en-us/products/human-trustain-fcx-fc-receptor-blocking-solution-6462</a>                                                                                                                                                                                                                                       |
| Ficoll-Paque™ PLUS Media                                  | GE Healthcare, Cat#17-1440-02   | <a href="https://www.sigmaaldrich.com/catalog/product/sigma/ge17144002?lang=en&amp;region=US#:~:text=Ficoll%2DPaque%20Plus%20is%20a,simple%20and%20rapid%20centrifugation%20procedure.">https://www.sigmaaldrich.com/catalog/product/sigma/ge17144002?lang=en&amp;region=US#:~:text=Ficoll%2DPaque%20Plus%20is%20a,simple%20and%20rapid%20centrifugation%20procedure.</a>                                                                                 |
| Liberase™ TL Research Grade                               | MilliporeSigma, Cat# 5401020001 | <a href="https://www.sigmaaldrich.com/catalog/product/roche/05401020001?lang=en&amp;region=US">https://www.sigmaaldrich.com/catalog/product/roche/05401020001?lang=en&amp;region=US</a>                                                                                                                                                                                                                                                                   |
| EBM-2 medium                                              | Lonza Inc; #CC-3156             | <a href="https://bioscience.lonza.com/lonza_bs/US/en/Primary-and-Stem-Cells/p/000000000000185299/EBM-2-Endothelial-Cell-Growth-Basal-Medium-2%2C-500-mL">https://bioscience.lonza.com/lonza_bs/US/en/Primary-and-Stem-Cells/p/000000000000185299/EBM-2-Endothelial-Cell-Growth-Basal-Medium-2%2C-500-mL</a>                                                                                                                                               |
| Basic Fibroblast Growth Factor, human (hbFGF)             | MilliporeSigma #11123149001     | <a href="https://www.sigmaaldrich.com/catalog/product/roche/hbfgfro?lang=en&amp;region=US">https://www.sigmaaldrich.com/catalog/product/roche/hbfgfro?lang=en&amp;region=US</a>                                                                                                                                                                                                                                                                           |
| Human TGF-beta 1 Protein                                  | R&D Systems, # 100-B-001        | <a href="https://www.rndsystems.com/products/human-tgf-beta-1-protein_100-b">https://www.rndsystems.com/products/human-tgf-beta-1-protein_100-b</a>                                                                                                                                                                                                                                                                                                       |
| Difco™ Gelatin                                            | BD, REF# 214340                 | <a href="https://us.vwr.com/store/product/21080742/difcotm-gelatin-granulated-bd">https://us.vwr.com/store/product/21080742/difcotm-gelatin-granulated-bd</a>                                                                                                                                                                                                                                                                                             |
| iScript™ Reverse Transcription Supermix for RT-qPCR       | Bio-RAD, 1708840                | <a href="https://www.bio-rad.com/en-us/product/iscript-reverse-transcription-supermix-for-rt-qpcr?ID=M87EVMKG4">https://www.bio-rad.com/en-us/product/iscript-reverse-transcription-supermix-for-rt-qpcr?ID=M87EVMKG4</a>                                                                                                                                                                                                                                 |
| Kapa Sybr Fast ABI Prism 2x qPCR Master Mix               | KAPA BioSystems, # KK4604       | <a href="https://www.sigmaaldrich.com/catalog/product/ROCHE/SFABIKB?lang=en&amp;region=US">https://www.sigmaaldrich.com/catalog/product/ROCHE/SFABIKB?lang=en&amp;region=US</a>                                                                                                                                                                                                                                                                           |
| Ovine Cytokine Array C1                                   | Ray Biotech; # AAO-CYT-1-2      | <a href="https://www.raybiotech.com/ovine-cytokine-array-c1/">https://www.raybiotech.com/ovine-cytokine-array-c1/</a>                                                                                                                                                                                                                                                                                                                                     |
| Recombinant Human sFRP-3 Protein                          | R&D Systems, #7584-SF-025       | <a href="https://www.rndsystems.com/products/recombinant-human-sfrp-3-protein_7584-sf">https://www.rndsystems.com/products/recombinant-human-sfrp-3-protein_7584-sf</a>                                                                                                                                                                                                                                                                                   |
| Ovine sFRP-3 ELISA                                        | RayBiotech #ELO-sFRP3-1         | <a href="https://www.raybiotech.com/ovine-sfrp-3-elisa/">https://www.raybiotech.com/ovine-sfrp-3-elisa/</a>                                                                                                                                                                                                                                                                                                                                               |

|                                                                                  |                                |                                                                                                                                                                                                                                                                                                                                                                                                                                                                                   |
|----------------------------------------------------------------------------------|--------------------------------|-----------------------------------------------------------------------------------------------------------------------------------------------------------------------------------------------------------------------------------------------------------------------------------------------------------------------------------------------------------------------------------------------------------------------------------------------------------------------------------|
| Cell Lysis Buffer (10X)                                                          | Cell Signaling, #9803          | <a href="https://www.cellsignal.com/products/buffers-dyes/cell-lysis-buffer-10x/9803?Ntk=Products&amp;Ntt=9803">https://www.cellsignal.com/products/buffers-dyes/cell-lysis-buffer-10x/9803?Ntk=Products&amp;Ntt=9803</a>                                                                                                                                                                                                                                                         |
| Protease/Phosphatase Inhibitor Cocktail (100X)                                   | Cell Signaling, #5872          | <a href="https://www.cellsignal.com/products/buffers-dyes/protease-phosphatase-inhibitor-cocktail-100x/5872?Ntk=Products&amp;Ntt=5872">https://www.cellsignal.com/products/buffers-dyes/protease-phosphatase-inhibitor-cocktail-100x/5872?Ntk=Products&amp;Ntt=5872</a>                                                                                                                                                                                                           |
| 4–20% Criterion™ TGX™ Precast Midi Protein Gel                                   | BIO-RAD, #5671094              | <a href="https://www.bio-rad.com/en-us/sku/5671094-4-20-criterion-tgx-precaster-midi-protein-gel-18-well-30-ul?ID=5671094">bio-rad.com/en-us/sku/5671094-4-20-criterion-tgx-precaster-midi-protein-gel-18-well-30-ul?ID=5671094</a>                                                                                                                                                                                                                                               |
| Trans-Blot Turbo RTA Midi 0.2 µm Nitrocellulose Transfer Kit                     | BIO-RAD, #1704271              | <a href="https://www.bio-rad.com/en-us/sku/1704271-trans-blot-turbo-rta-midi-0-2-um-nitrocellulose-transfer-kit-for-40-blots?ID=1704271">https://www.bio-rad.com/en-us/sku/1704271-trans-blot-turbo-rta-midi-0-2-um-nitrocellulose-transfer-kit-for-40-blots?ID=1704271</a>                                                                                                                                                                                                       |
| 6.5 mm Transwell® with 8.0 µm Pore Polycarbonate Membrane Insert, Sterile        | Corning, #3422                 | <a href="https://ecatalog.corning.com/life-sciences/b2c/US/en/Permeable-Supports/Inserts/Transwell%20AE-Permeable-Supports,-Polycarbonate-(PC)-Membrane/p/3422">https://ecatalog.corning.com/life-sciences/b2c/US/en/Permeable-Supports/Inserts/Transwell%20AE-Permeable-Supports,-Polycarbonate-(PC)-Membrane/p/3422</a>                                                                                                                                                         |
| Thermo Scientific™ Richard-Allan Scientific™ Three-Step Stain Kit and Components | Thermo Scientific, #22-050-272 | <a href="https://www.fishersci.com/shop/products/richard-allan-scientific-three-step-stain/p-4530230">https://www.fishersci.com/shop/products/richard-allan-scientific-three-step-stain/p-4530230</a>                                                                                                                                                                                                                                                                             |
| Clarity Western ECL Substrate                                                    | BIO-RAD, #1705061              | <a href="https://www.bio-rad.com/en-us/sku/1705061-clarity-western-ecl-substrate-500-ml?ID=1705061">https://www.bio-rad.com/en-us/sku/1705061-clarity-western-ecl-substrate-500-ml?ID=1705061</a>                                                                                                                                                                                                                                                                                 |
| ProLong® Gold Antifade Reagent with DAPI                                         | Cell Signaling, #8961          | <a href="https://www.cellsignal.com/products/buffers-dyes/prolong-gold-antifade-reagent-with-dapi/8961#:~:text=ProLong%20Gold%20Antifade%20Reagent%20with%20DAPI%20offers%20enhanced%20resistance,saved%20for%20months%20after%20mounting.">https://www.cellsignal.com/products/buffers-dyes/prolong-gold-antifade-reagent-with-dapi/8961#:~:text=ProLong%20Gold%20Antifade%20Reagent%20with%20DAPI%20offers%20enhanced%20resistance,saved%20for%20months%20after%20mounting.</a> |

**Table S2. Primer pairs used in this study for qPCR analysis.**

| <b>Gene</b>   | <b>Forward</b>              | <b>Reverse</b>              |
|---------------|-----------------------------|-----------------------------|
| RSP9          | 5'-CGACCAAGAGCTGAAGCTGA-3'  | 5'-TTCATCTTGCCCTCGTCCAG-3'  |
| VE-cadherin   | 5'-ACATCCGTGGTTCTGGACTC-3'  | 5'-AGATGGGGAAGTTGTCGTTG-3'  |
| $\alpha$ SMA  | 5'-AGCTTCGTGTTGCTCCTGAA-3'  | 5'-GTGGGTGACACCATCTCCAG-3'  |
| Slug          | 5'-GGACGCACACCTTACCTTGT-3'  | 5'-CGAGAAGGTTTTGGAGCAAC-3'  |
| MMP2          | 5'-GAGACTCCCACTTCGACGAC-3'  | 5'-AACACCAGAGGAAACCATCG-3'  |
| TGF $\beta$ 1 | 5'-CAATTCCTGGCGCTACCTCA-3'  | 5'-GGTTCATGCCGTGAATGGTG-3'  |
| TGF $\beta$ 2 | 5'-ACCCTCGGAAAATGCCATCC-3'  | 5'-TTCGTGAACAGCATCGGTGA-3'  |
| TGF $\beta$ 3 | 5'-ACAGTGATGATGATCCGGGC-3'  | 5'-CAATGTAGAGAGGGCGCACA-3'  |
| FOXM1         | 5'-CTCTGGTCTGGATAGGGGGTC-3' | 5'-AGGAGTATGGGGGTCGTTCA-3'  |
| CCNB1         | 5'-CCCATGCCTCAAGACAGATT-3'  | 5'-TGATGGAGCTGTTTGCAGTGA-3' |

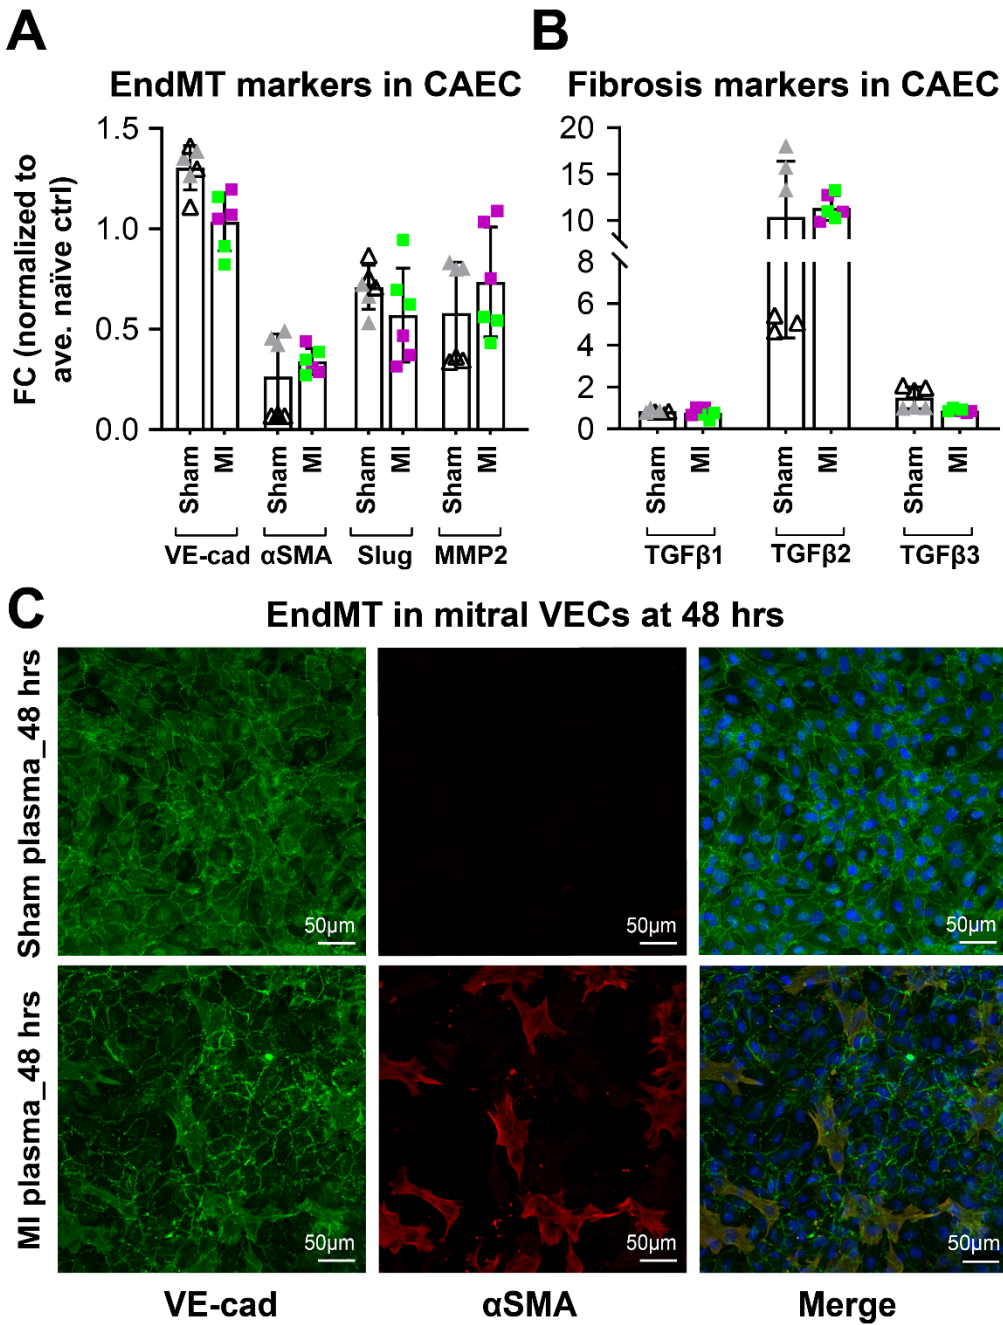

**Figure S1.** Carotid artery endothelial cells (CAEC) were exposed to plasma from two different naïve, two different sham (open and grey triangles), and two different inferior MI (green and purple squares) animals for 24 hours prior to qPCR analysis. The data from naïve animals (n=2) were used for normalization of sham and MI samples and is not shown in the graphs. Normalized mRNA levels of the indicated

markers of EndMT (A), and fibrosis (B) from three technical replicates are shown. (C) Mitral VECs treated for 48 hours with sham-operated (top row) or post-MI plasma (lower row) were stained for VE-cadherin and  $\alpha$ -SMA (scale bar: 50  $\mu$ m).

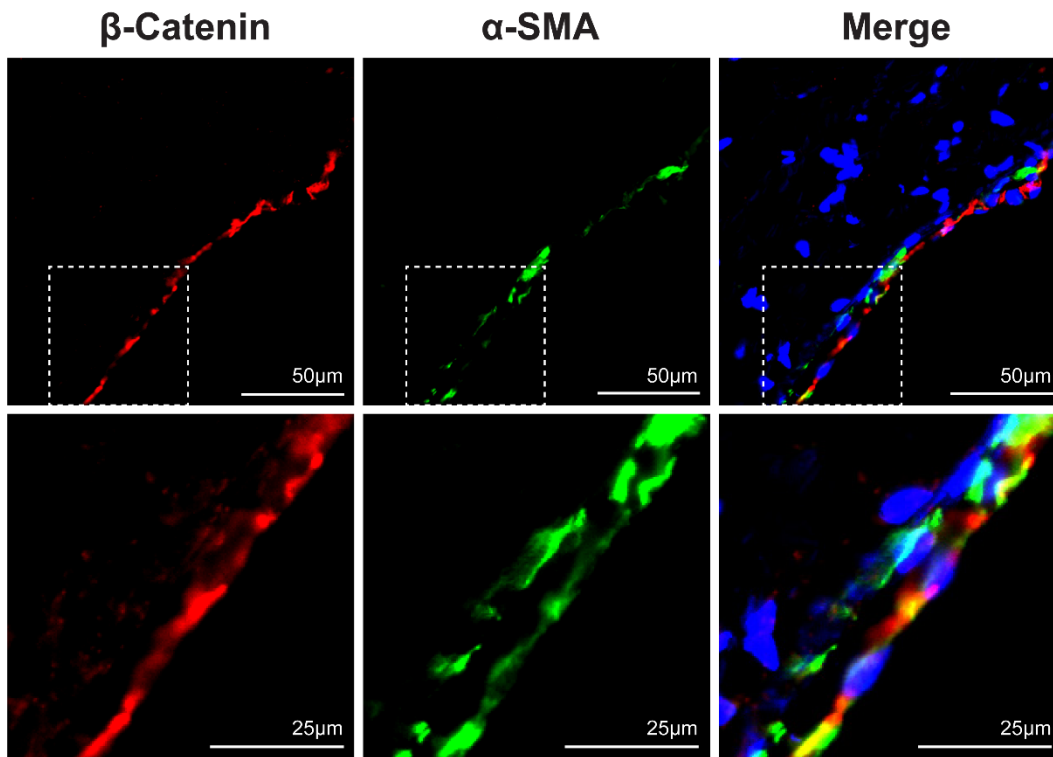

**Figure S2.** Double antibody-stained MV leaflet from 8–10-day post MI animal shows co-expression of  $\beta$ -Catenin and  $\alpha$ -SMA along the MV endothelium (scale bar: 50  $\mu$ m). Boxed areas are enlarged in the lower row.



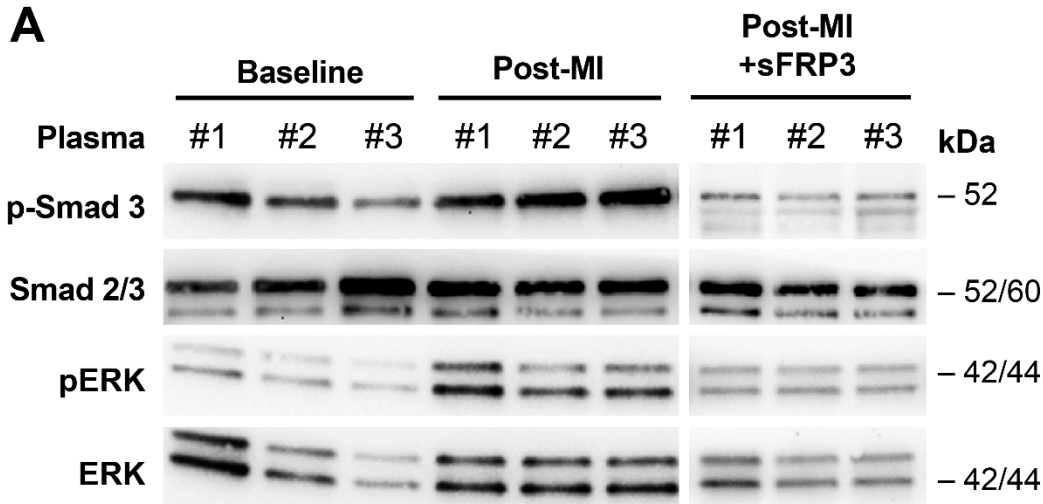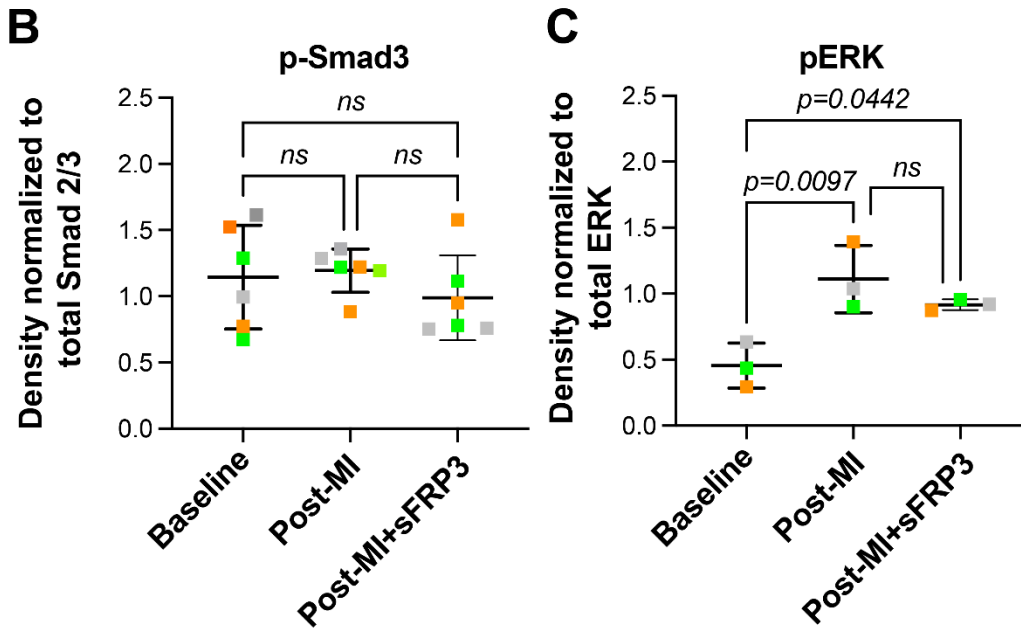

**Figure S3.** (A) Mitral VECs were treated with three individuals ovine before MI (baseline), post-MI, sFRP3 supplemented post-MI plasma for 10 minutes and lysates were subjected to western blot analysis. (B) Band densities were quantified and subjected to one-way ANOVA ( $F(2,15) = 0.7333$ ;  $p = 0.04968$ ) with Tukey's multiple comparisons test which revealed non-significant (ns) results for all conducted analysis. (C) Band densities were quantified and subjected to one-way ANOVA ( $F(2,6) = 10.7$ ;

$p=0.0105$ ) with Tukey's multiple comparisons test with  $p$  values indicated on the graph for each comparison.

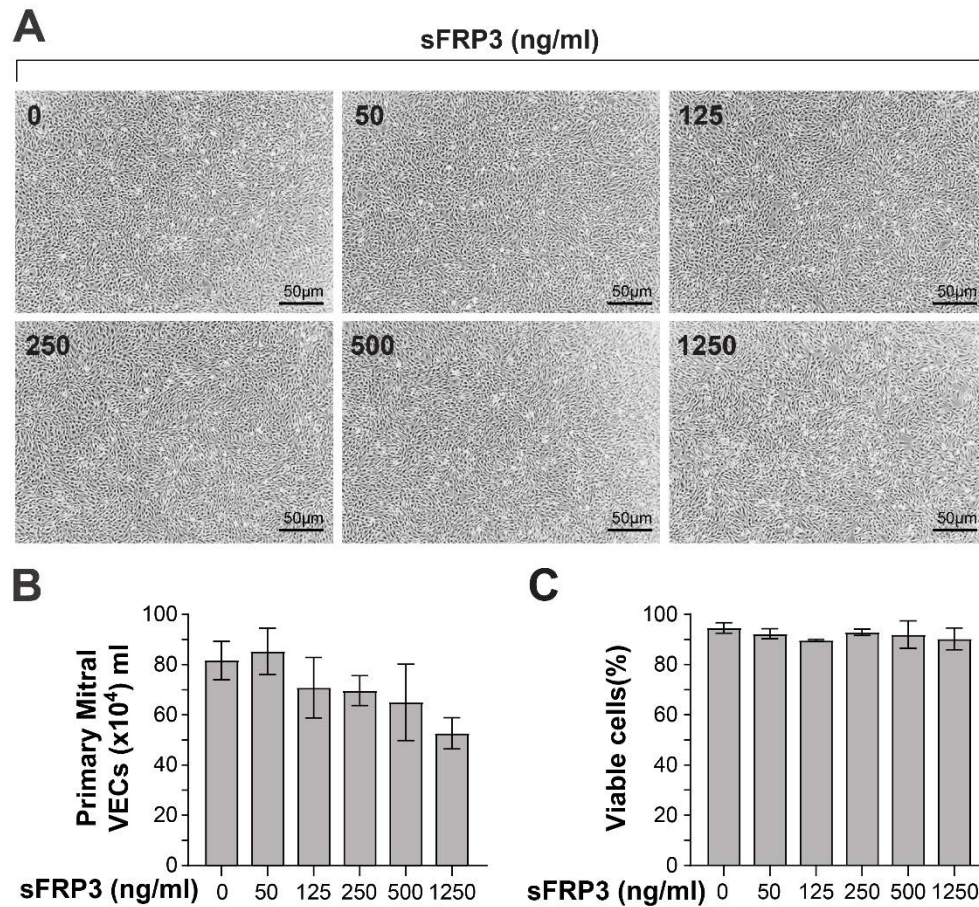

**Figure S4.** (A) Primary mitral VECs were treated with 0, 50, 125, 250, 500, and 1250 ng/ml of recombinant sFRP3 for 24 hours and imaged by phase contrast microscopy (scale bar: 50  $\mu$ m). Total cells (B) and percent viable cells (C) were determined after trypsinization. Data from three independent assays were graphed.

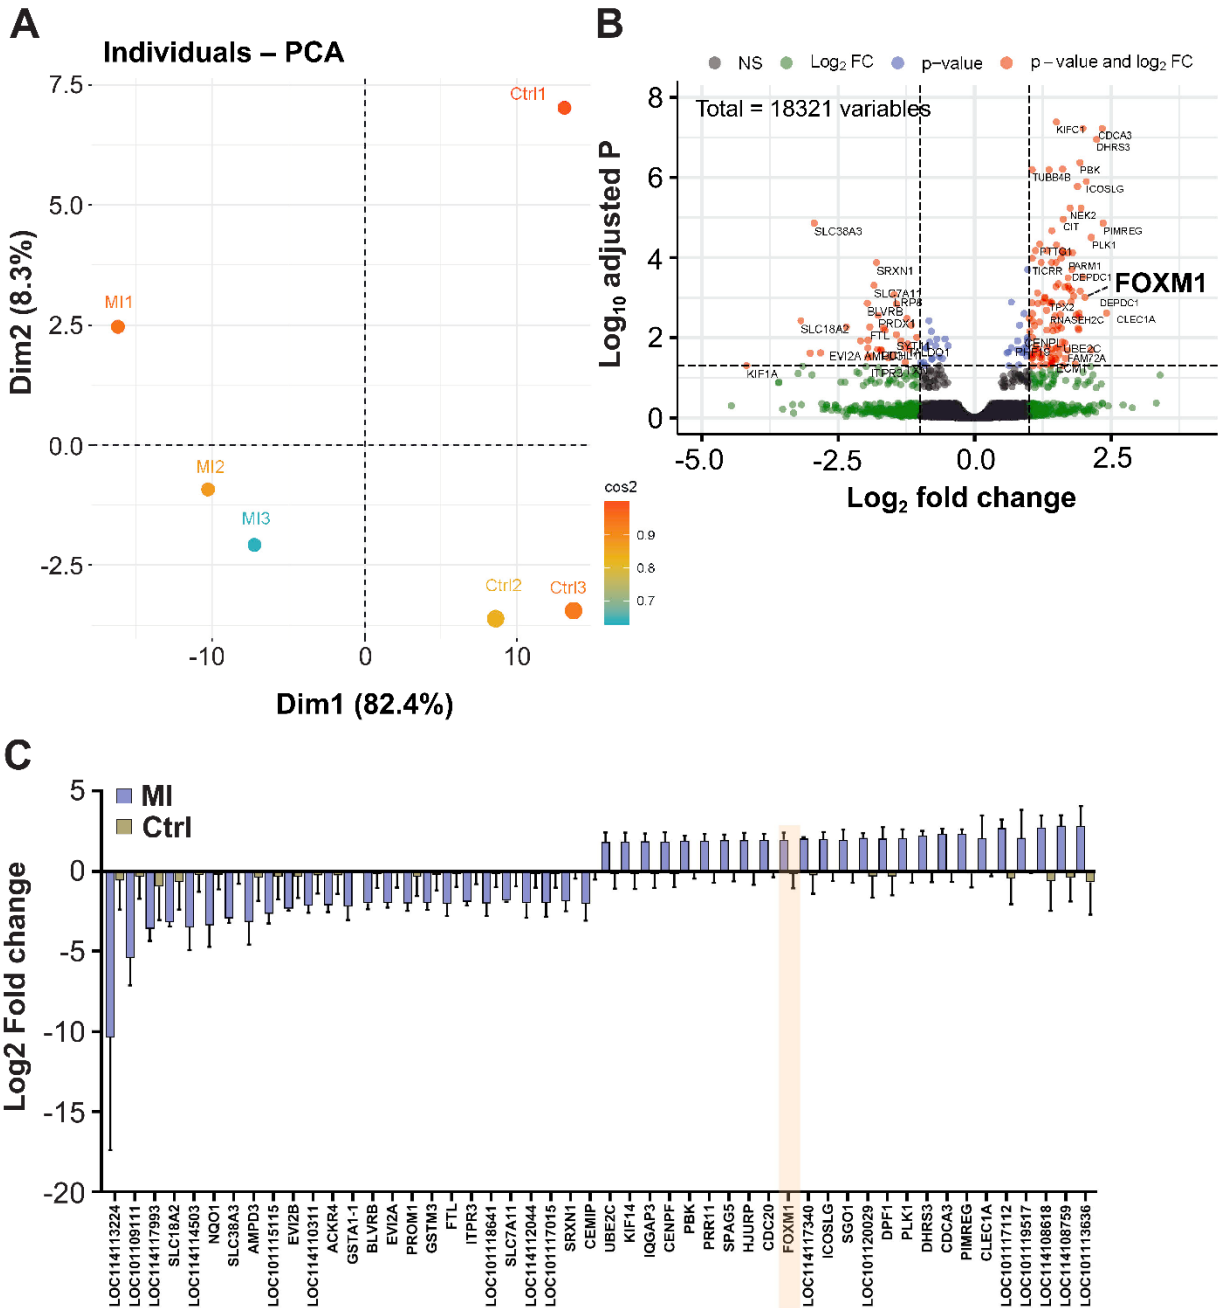

**Figure S5.** (A) Principal component (PC) analysis of the data in a 2D graph of PC1 and PC2. The bi-plot shows samples as labelled dots. The quality of representation of the variables on factor map is called cos2 (square cosine, squared coordinates). (B) Volcano plot of 18321 mRNAs. Differentially expressed genes are

visualized in red color. Blue dots illustrate the genes with adjusted  $p$ -value  $< 0.05$  but  $\log_2$  fold change less than 1. Green dots represent non-significant genes. (C) Top 50 significantly regulated genes shown as 25 top downregulated and 25 top upregulated. Upregulated FOXM1 is highlighted in peach. Adjusted  $p$ -value is less than 0.05 for all of these genes.

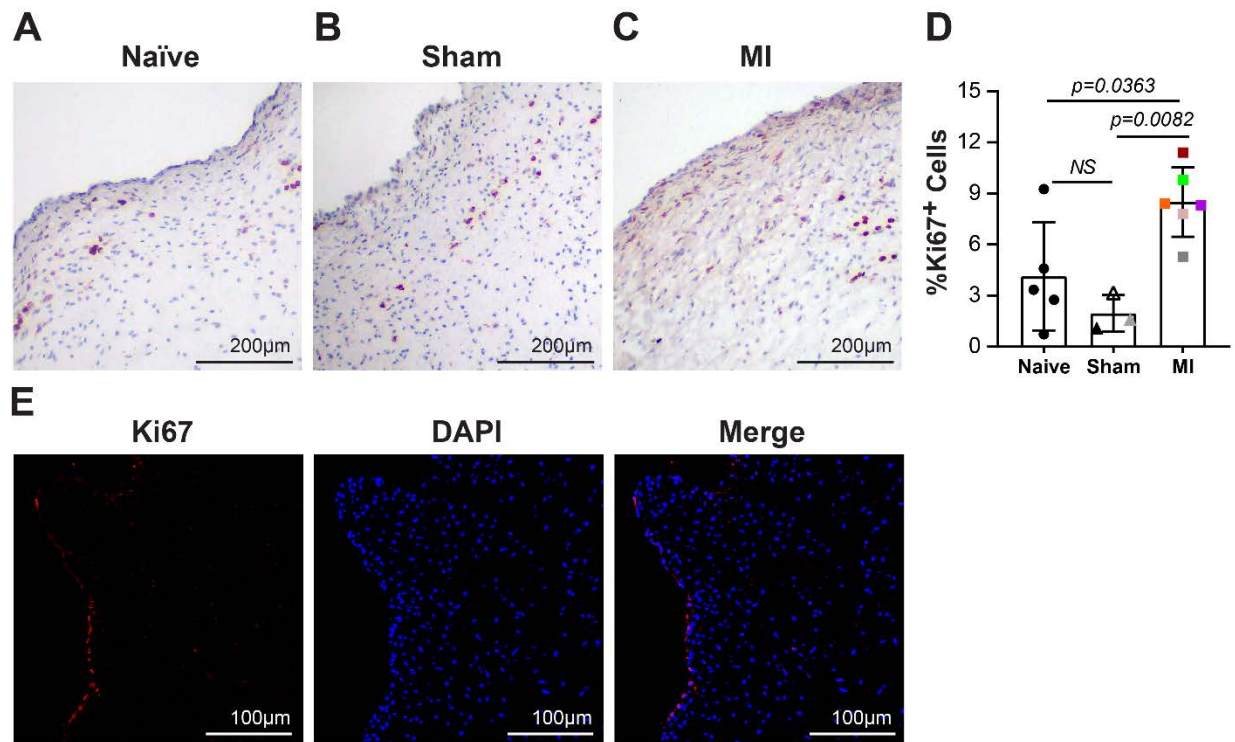

**Figure S6.** Mitral valve tissue from naïve (A), sham (B), and inferior MI (C) animals were stained for Ki-67 using IHC. (D) Number of cells expressing Ki-67 divided by total nuclei from 5 fields from 20X magnification per each individual section was graphed.  $P$  values were calculated using one-way ANOVA ( $p=0.0054$ ,  $F=8.710$ ) with Sidak multiple comparisons test. (E) Mitral valve tissue from an MI animal was stained for Ki-67 (red) using immunofluorescence staining. DAPI was used to stain nuclei (scale bar: 100  $\mu$ m).

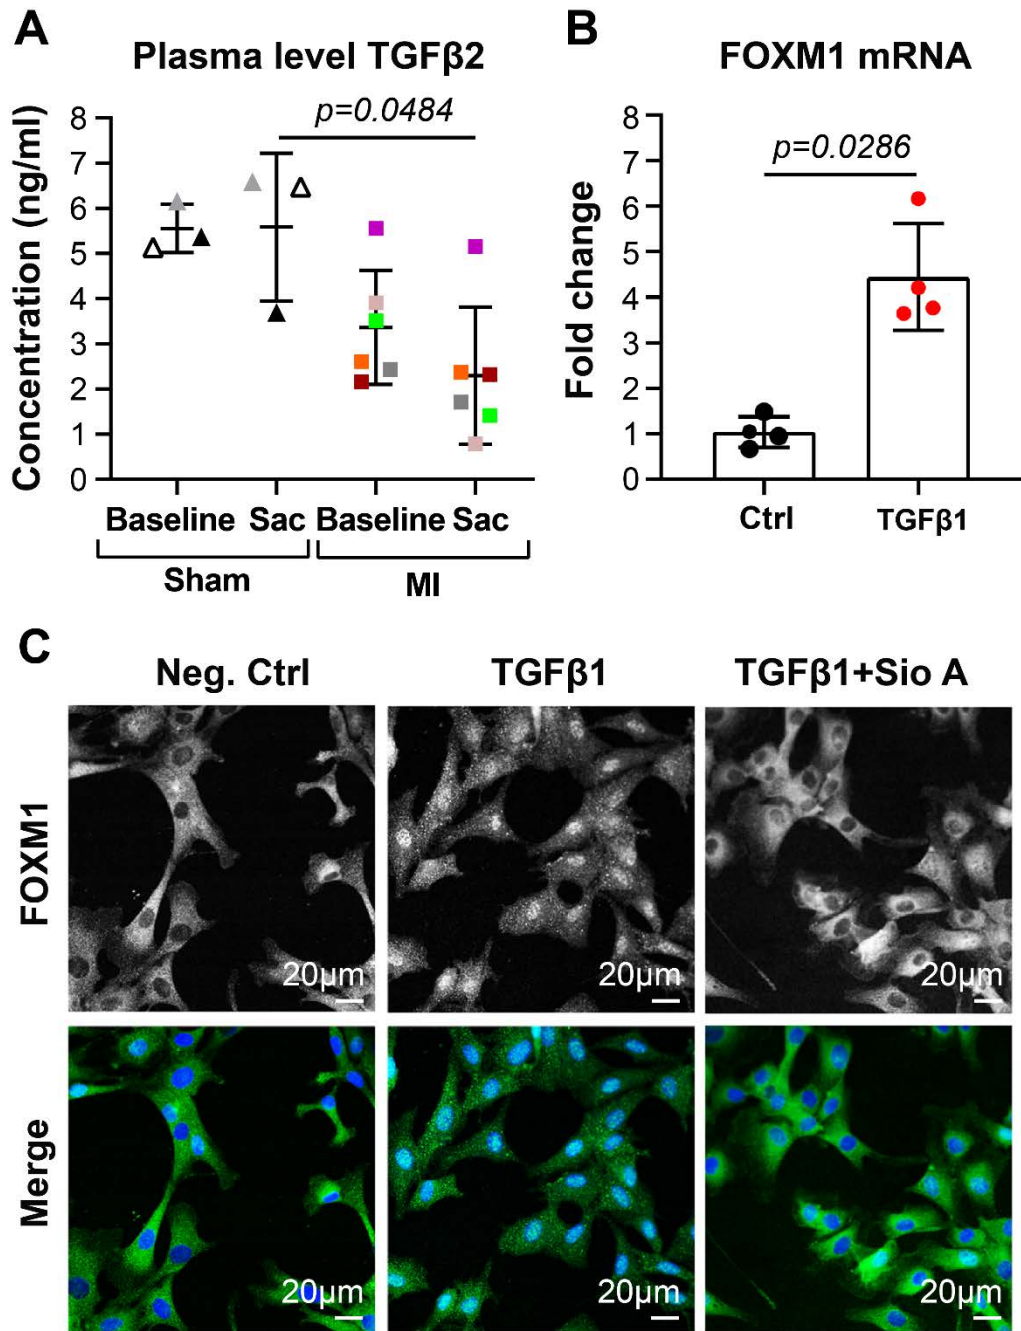

**Figure S7.** (A) Plasma TGFβ2 in sham (n=3) versus MI (n=6) plasma was measured by ELISA. Non-parametric Kruskal-Wallis test was performed following Dunn's multiple comparisons test. (B) Mitral VECs were treated with 2 ng/ml of TGFβ1 for 24 hours and lysates were analyzed by qPCR for FOXM1 transcripts. Values are

normalized to cells with no treatment and mean  $\pm$ SD from four independent assays are presented in the graph. P values were calculated using non-parametric Mann Whitney test. (C) Mitral VECs treated for 24 hours with 1) media only (neg. ctrl), 2) TGF $\beta$ 1 (2 ng/ml), and 3) TGF $\beta$ 1 (2 ng/ml) +Sio A (1  $\mu$ M) were stained using FOXM1 antibody (green). DAPI was used to stain nuclei (scale bar: 20  $\mu$ m); FOXM1 staining is shown in black and white in the upper panel and the merge with DAPI is shown in color in the lower panel.
